# Supplementary material
Source: PubMed Central journal article supplement (PMC7513622)
Supplement: NIHMS1624158-supplement-Appendix.pdf [file NIHMS1624158-supplement-Appendix.pdf]

# THE LANCET **Oncology**

## **Supplementary appendix**

This appendix formed part of the original submission and has been peer reviewed. We post it as supplied by the authors.

Supplement to: Tabernero J, Lenz H-J, Siena S, et al. Analysis of circulating DNA and protein biomarkers to predict the clinical activity of regorafenib and assess prognosis in patients with metastatic colorectal cancer: a retrospective, exploratory analysis of the CORRECT trial. *Lancet Oncol* 2015; published online July 14. [http://dx.doi.org/10.1016/S1470-2045\(15\)00138-2](http://dx.doi.org/10.1016/S1470-2045(15)00138-2).

## Analysis of circulating DNA and protein biomarkers to predict the clinical activity of regorafenib and assess prognosis in patients with metastatic colorectal cancer: a retrospective, exploratory analysis of the CORRECT trial

Josep Taberero\*, Heinz-Josef Lenz\*, Salvatore Siena, Alberto Sobrero, Alfredo Falcone, Marc Ychou, Yves Humblet, Olivier Bouché, Laurent Mineur, Carlo Barone, Antoine Adenis, Takayuki Yoshino, Richard M Goldberg, Daniel J Sargent, Andrea Wagner, Dirk Laurent, Michael Teufel, Michael Jeffers, Axel Grothey, Eric Van Cutsem

\*Co-first authors

### Supplementary appendix

---

|                       |                                                                                                                                                                                    |         |
|-----------------------|------------------------------------------------------------------------------------------------------------------------------------------------------------------------------------|---------|
| Supplementary Table 1 | Hot-spot mutations analysed by BEAMing in CORRECT                                                                                                                                  | Page 2  |
| Supplementary Table 2 | KRAS mutations detected by plasma DNA BEAMing in patients in the CORRECT trial whose tumours were determined to be KRAS wild type by genotyping of archival tumour tissue DNA      | Page 3  |
| Supplementary Table 3 | KRAS and PIK3CA mutations in patients in the CORRECT trial in whom mutations were detected via BEAMing in patient-matched plasma DNA and tumour tissue DNA samples                 | Page 4  |
| Supplementary Table 4 | Patients in the CORRECT trial classified as KRAS mutant by BEAMing analysis of both tumour tissue DNA and plasma DNA, but KRAS wild type by historical genotyping of tumour tissue | Page 8  |
| Supplementary Table 5 | Association of baseline plasma DNA levels with overall survival in placebo patients in the CORRECT trial                                                                           | Page 9  |
| Supplementary Table 6 | Association of KRAS-mutant allele frequency detected in plasma DNA with overall survival in placebo patients in the CORRECT trial                                                  | Page 10 |
| Supplementary Table 7 | Association of KRAS-mutant molecules detected per ml of plasma with overall survival in placebo-treated patients in the CORRECT trial                                              | Page 11 |
| Supplementary Table 8 | Clinical activity of regorafenib versus placebo in patients in the CORRECT trial with high or low plasma protein levels                                                            | Page 12 |
| Supplementary Table 9 | Supplementary Table 8. Clinical activity of regorafenib versus placebo in patients in the CORRECT trial with high or low plasma protein levels                                     | Page 16 |

---

Supplementary Table 1. Hot-spot mutations analysed by BEAMing in CORRECT

| <b>Gene</b>   | <b>Nucleotide change</b> | <b>Amino acid change</b> |
|---------------|--------------------------|--------------------------|
| <i>KRAS</i>   | G34A                     | G12S                     |
|               | G34C                     | G12R                     |
|               | G34T                     | G12C                     |
|               | G35A                     | G12D                     |
|               | G35C                     | G12A                     |
|               | G35T                     | G12V                     |
|               | G38A                     | G13D                     |
|               | A183C                    | Q61H                     |
|               | G436A                    | A146T                    |
| <i>PIK3CA</i> | G1624A                   | E542K                    |
|               | G1633A                   | E545K                    |
|               | A1634G                   | E545G                    |
|               | C3139T                   | H1047Y                   |
|               | A3140G                   | H1047R                   |
|               | A3140T                   | H1047L                   |
| <i>BRAF</i>   | T1799A                   | V600E                    |

Supplementary Table 2. *KRAS* mutations detected by plasma DNA BEAMing in patients in the CORRECT trial whose tumours were determined to be *KRAS* wild type by genotyping of archival tumour tissue DNA

| <i>KRAS</i> status by tumour tissue DNA BEAMing | <i>KRAS</i> status by plasma DNA BEAMing |                                  | Prior EGFR therapy     |
|-------------------------------------------------|------------------------------------------|----------------------------------|------------------------|
|                                                 | Hot-spot mutation                        | Mutant allele frequency (%)      |                        |
| Patient 1                                       | G12A + Q61H                              | 0.53 + 0.21                      | Panitumumab            |
| Patient 2*                                      | Q61H                                     | 1.05                             | Cetuximab              |
| Patient 3*                                      | G12C                                     | 0.38                             | Cetuximab              |
| Patient 4                                       | G12R + Q61H                              | 0.09 + 0.03                      | Cetuximab, panitumumab |
| Patient 5                                       | G12C + G12D + G12A + G12V + G12R         | 0.16 + 1.35 + 0.24 + 1.07 + 0.06 | Cetuximab              |
| Patient 6                                       | Q61H                                     | 14.56                            | Cetuximab              |
| Patient 7                                       | G12C + G12A                              | 0.04 + 0.17                      | Cetuximab              |
| Patient 8                                       | Q61H + G12C                              | 0.03 + 0.03                      | Cetuximab              |
| Patient 9*                                      | Q61H + G12C + G12A + G13D                | 5.64 + 0.34 + 0.32 + 0.09        | Cetuximab              |
| Patient 10*                                     | G12A + G12V + Q61H                       | 0.06 + 0.07 + 0.04               | Cetuximab              |
| Patient 11*                                     | G12V                                     | 0.05                             | Panitumumab            |
| Patient 12*                                     | G12A                                     | 1.13                             | Panitumumab            |
| Patient 13*                                     | G12A + Q61H                              | 0.03 + 0.31                      | Cetuximab              |
| Patient 14*                                     | Q61H + G12A                              | 0.05 + 0.09                      | Cetuximab              |
| Patient 15*                                     | G12A + Q61H                              | 0.02 + 0.42                      | Cetuximab              |
| Patient 16*                                     | Q61H + G12A + G13D                       | 5.82 + 0.44 + 1.16               | Cetuximab              |
| Patient 17*                                     | G12A + Q61H                              | 22.31 + 0.02                     | Cetuximab, panitumumab |
| Patient 18*                                     | Q61H                                     | 0.04                             | Cetuximab              |
| Patient 19*                                     | Q61H + G12S + G12D + G13D                | 1.58 + 0.20 + 0.13 + 0.07        | Panitumumab            |
| Patient 20                                      | Q61H + G12A                              | 0.43 + 0.05                      | Cetuximab              |
| Patient 21*                                     | Q61H + G12R + G12V                       | 0.05 + 0.11 + 0.03               | Panitumumab            |
| Patient 22*                                     | Q61H + G12D + G13D                       | 0.05 + 0.05 + 0.06               | Cetuximab              |
| Patient 23*                                     | G12V + G13D                              | 0.05 + 0.03                      | Cetuximab              |
| Patient 24                                      | Q61H + G12D                              | 0.15 + 0.05                      | Cetuximab, panitumumab |
| Patient 25*                                     | G12D                                     | 0.20                             | Cetuximab              |
| Patient 26*                                     | G13D                                     | 2.26                             | Cetuximab              |
| Patient 27                                      | Q61H + G12C + G13D                       | 0.07 + 0.04 + 0.03               | Panitumumab            |
| Patient 28*                                     | Q61H                                     | 0.20                             | Cetuximab, panitumumab |
| Patient 29                                      | Q61H                                     | 0.14                             | Cetuximab              |
| Patient 30                                      | G12R + G12D                              | 0.09 + 0.07                      | Panitumumab            |

Historical *KRAS* mutation data were generated before the start of the CORRECT trial using unknown testing technology and reported to the study sponsor at the time of enrolment.

\*Specimens in which *KRAS*-wild-type status was also confirmed by next-generation sequencing. Because of the limited amount of tissue available for testing, next-generation sequencing was not performed on all samples.

Supplementary Table 3. *KRAS* and *PIK3CA* mutations in patients in the CORRECT trial in whom mutations were detected via BEAMing in patient-matched plasma DNA and tumour tissue DNA samples

| Gene        | Plasma DNA BEAMing |                             | Tumour tissue DNA BEAMing |
|-------------|--------------------|-----------------------------|---------------------------|
|             | Hot-spot mutation  | Mutant allele frequency (%) | Hot-spot mutation         |
| <i>KRAS</i> | G12D               | 32-67                       | G12D                      |
| <i>KRAS</i> | G12D               | 47-65                       | G12D                      |
| <i>KRAS</i> | G12D               | 5-96                        | G12D                      |
| <i>KRAS</i> | G12D               | 1-01                        | G12D                      |
| <i>KRAS</i> | G12D               | 18-06                       | G12D                      |
| <i>KRAS</i> | G12D               | 18-01                       | G12D                      |
| <i>KRAS</i> | G12D               | 0-06                        | G12D                      |
| <i>KRAS</i> | G12D               | 1-40                        | G12D                      |
| <i>KRAS</i> | G12D               | 9-90                        | G12D                      |
| <i>KRAS</i> | G12D               | 0-16                        | G12D                      |
| <i>KRAS</i> | G12D               | 1-68                        | G12D                      |
| <i>KRAS</i> | G12D               | 34-79                       | G12D                      |
| <i>KRAS</i> | G12D               | 15-82                       | G12D                      |
| <i>KRAS</i> | G12D               | 5-55                        | G12D                      |
| <i>KRAS</i> | G12D               | 3-84                        | G12D                      |
| <i>KRAS</i> | G12D               | 15-60                       | G12D                      |
| <i>KRAS</i> | G12D               | 11-65                       | G12A                      |
| <i>KRAS</i> | G12D               | 1-34                        | G12D                      |
| <i>KRAS</i> | G12D               | 5-42                        | G12D                      |
| <i>KRAS</i> | G12D               | 5-84                        | G12D                      |
| <i>KRAS</i> | G12D               | 2-87                        | G12D                      |
| <i>KRAS</i> | G12D               | 0-13                        | G12D + G13D               |
| <i>KRAS</i> | G12D               | 0-34                        | G12D                      |
| <i>KRAS</i> | G12D               | 0-13                        | G12D                      |
| <i>KRAS</i> | G12D               | 3-53                        | G12D                      |
| <i>KRAS</i> | G12D               | 3-20                        | G12D                      |
| <i>KRAS</i> | G12D               | 0-70                        | G12D                      |
| <i>KRAS</i> | G12D               | 3-55                        | G12D                      |
| <i>KRAS</i> | G12D               | 17-85                       | G12D                      |
| <i>KRAS</i> | G12D               | 0-09                        | G12D                      |
| <i>KRAS</i> | G12D               | 11-09                       | G12D                      |
| <i>KRAS</i> | G12D               | 11-38                       | G12D                      |
| <i>KRAS</i> | G12D               | 6-84                        | G12D                      |
| <i>KRAS</i> | G12D               | 0-21                        | G12D                      |
| <i>KRAS</i> | G12D               | 0-32                        | G12D                      |
| <i>KRAS</i> | G12D               | 1-21                        | G12D                      |
| <i>KRAS</i> | G12D               | 23-71                       | G12D                      |
| <i>KRAS</i> | G12D               | 23-34                       | G12D                      |
| <i>KRAS</i> | G12D               | 0-37                        | G12D                      |

| Gene        | Plasma DNA BEAMing |                             | Tumour tissue DNA BEAMing |
|-------------|--------------------|-----------------------------|---------------------------|
|             | Hot-spot mutation  | Mutant allele frequency (%) | Hot-spot mutation         |
| <i>KRAS</i> | G12D               | 0.63                        | G12D                      |
| <i>KRAS</i> | G12D               | 3.63                        | G12D                      |
| <i>KRAS</i> | G12D               | 0.41                        | G12D                      |
| <i>KRAS</i> | G12D               | 18.17                       | G12D                      |
| <i>KRAS</i> | G12V + G12S        | 7.31 + 3.04                 | G12V + G12S               |
| <i>KRAS</i> | G12V               | 16.25                       | G12V                      |
| <i>KRAS</i> | G12V               | 18.85                       | G12V                      |
| <i>KRAS</i> | G12V               | 22.65                       | G12V                      |
| <i>KRAS</i> | G12V               | 15.96                       | G12V                      |
| <i>KRAS</i> | G12V               | 19.20                       | G12V                      |
| <i>KRAS</i> | G12V               | 17.40                       | G12V                      |
| <i>KRAS</i> | G12V               | 0.72                        | G12V                      |
| <i>KRAS</i> | G12V               | 36.14                       | G12V                      |
| <i>KRAS</i> | G12V               | 7.46                        | G12V                      |
| <i>KRAS</i> | G12V               | 24.09                       | G12V                      |
| <i>KRAS</i> | G12V               | 23.99                       | G12V                      |
| <i>KRAS</i> | G12V               | 15.64                       | G12V                      |
| <i>KRAS</i> | G12V               | 13.09                       | G12V                      |
| <i>KRAS</i> | G12V               | 5.05                        | G12V                      |
| <i>KRAS</i> | G12V               | 13.51                       | G12V                      |
| <i>KRAS</i> | G12V               | 32.67                       | G12V                      |
| <i>KRAS</i> | G12V               | 0.03                        | G12V                      |
| <i>KRAS</i> | G12V               | 1.71                        | G12V                      |
| <i>KRAS</i> | G12V               | 18.60                       | G12V                      |
| <i>KRAS</i> | G12V               | 10.66                       | G12V                      |
| <i>KRAS</i> | G12V               | 0.78                        | G12V                      |
| <i>KRAS</i> | G12V               | 30.58                       | G12V                      |
| <i>KRAS</i> | G12V               | 9.58                        | G12V                      |
| <i>KRAS</i> | G13D               | 20.19                       | G13D                      |
| <i>KRAS</i> | G13D               | 9.01                        | G13D                      |
| <i>KRAS</i> | G13D               | 2.65                        | G13D                      |
| <i>KRAS</i> | G13D               | 6.84                        | G13D                      |
| <i>KRAS</i> | G13D               | 2.90                        | G13D                      |
| <i>KRAS</i> | G13D               | 11.97                       | G13D                      |
| <i>KRAS</i> | G13D               | 1.89                        | G13D                      |
| <i>KRAS</i> | G13D               | 0.18                        | G13D                      |
| <i>KRAS</i> | G13D               | 24.34                       | G13D                      |
| <i>KRAS</i> | G13D               | 7.11                        | G13D                      |
| <i>KRAS</i> | G13D               | 0.70                        | G13D                      |
| <i>KRAS</i> | G13D               | 5.86                        | G13D                      |
| <i>KRAS</i> | G13D               | 0.45                        | G13D                      |

| Gene          | Plasma DNA BEAMing |                             | Tumour tissue DNA BEAMing |
|---------------|--------------------|-----------------------------|---------------------------|
|               | Hot-spot mutation  | Mutant allele frequency (%) | Hot-spot mutation         |
| <i>KRAS</i>   | G13D               | 0.29                        | G13D                      |
| <i>KRAS</i>   | G13D               | 5.31                        | G13D                      |
| <i>KRAS</i>   | G13D               | 16.21                       | G13D                      |
| <i>KRAS</i>   | G13D               | 3.64                        | G13D                      |
| <i>KRAS</i>   | G13D               | 2.68                        | G13D                      |
| <i>KRAS</i>   | G12A               | 17.96                       | G12A                      |
| <i>KRAS</i>   | G12A               | 0.12                        | G12A                      |
| <i>KRAS</i>   | G12A               | 0.09                        | G12A                      |
| <i>KRAS</i>   | G12A               | 16.58                       | G12A                      |
| <i>KRAS</i>   | G12A               | 0.05                        | G12A                      |
| <i>KRAS</i>   | G12S               | 11.32                       | G12S                      |
| <i>KRAS</i>   | G12S               | 23.82                       | G12S                      |
| <i>KRAS</i>   | G12S               | 0.46                        | G12S                      |
| <i>KRAS</i>   | G12S               | 57.93                       | G12S                      |
| <i>KRAS</i>   | G12C               | 23.62                       | G12C                      |
| <i>KRAS</i>   | G12C               | 19.84                       | G12C                      |
| <i>KRAS</i>   | G12C               | 9.76                        | G12C                      |
| <i>KRAS</i>   | G12C               | 0.86                        | G12C                      |
| <i>KRAS</i>   | G12R               | 17.50                       | G12R                      |
| <i>KRAS</i>   | G12R               | 10.61                       | G12R                      |
| <i>KRAS</i>   | G12R               | 14.11                       | G12R                      |
| <i>KRAS</i>   | A146T              | 26.60                       | A146T                     |
| <i>KRAS</i>   | A146T              | 45.76                       | A146T                     |
| <i>KRAS</i>   | A146T              | 1.64                        | A146T                     |
| <i>KRAS</i>   | A146T              | 34.69                       | A146T                     |
| <i>KRAS</i>   | Q61H               | 0.15                        | G12D                      |
| <i>KRAS</i>   | Q61H               | 1.36                        | Q61H                      |
| <i>KRAS</i>   | Q61H               | 0.89                        | Q61H                      |
| <i>PIK3CA</i> | E542K              | 5.83                        | E542K                     |
| <i>PIK3CA</i> | E542K              | 1.77                        | E542K                     |
| <i>PIK3CA</i> | E542K              | 9.94                        | E542K                     |
| <i>PIK3CA</i> | E542K              | 2.37                        | E542K                     |
| <i>PIK3CA</i> | E542K + E545G      | 7.24 + 0.03                 | E542K                     |
| <i>PIK3CA</i> | E542K              | 7.21                        | E542K                     |
| <i>PIK3CA</i> | E545K              | 20.51                       | E545K                     |
| <i>PIK3CA</i> | E545K              | 28.99                       | E545K                     |
| <i>PIK3CA</i> | E545K              | 0.76                        | E545K                     |
| <i>PIK3CA</i> | E545K              | 0.16                        | E545K                     |
| <i>PIK3CA</i> | E545K              | 1.67                        | E545K                     |
| <i>PIK3CA</i> | E545K              | 0.13                        | E545K                     |
| <i>PIK3CA</i> | E545K              | 0.24                        | E545K                     |

| <b>Gene</b>   | <b>Plasma DNA BEAMing</b> |                                    | <b>Tumour tissue DNA BEAMing</b> |
|---------------|---------------------------|------------------------------------|----------------------------------|
|               | <b>Hot-spot mutation</b>  | <b>Mutant allele frequency (%)</b> | <b>Hot-spot mutation</b>         |
| <i>PIK3CA</i> | E545K                     | 24.15                              | E545K                            |
| <i>PIK3CA</i> | H1047L                    | 12.68                              | H1047L                           |
| <i>PIK3CA</i> | H1047R                    | 7.03                               | H1047R                           |

Supplementary Table 4. Patients in the CORRECT trial classified as *KRAS* mutant by BEAMing analysis of both tumour tissue DNA and plasma DNA, but *KRAS* wild type by historical genotyping of tumour tissue

| <i>KRAS</i> status by historical tumour tissue DNA* | <i>KRAS</i> tumour tissue DNA BEAMing |               | <i>KRAS</i> plasma DNA BEAMing |               |
|-----------------------------------------------------|---------------------------------------|---------------|--------------------------------|---------------|
|                                                     | Hot-spot mutation                     | Frequency (%) | Hot-spot mutation              | Frequency (%) |
| Wild type                                           | G12D <sup>†</sup>                     | 7·10          | G12D                           | 9·90          |
| Wild type                                           | G12V <sup>†</sup>                     | 7·20          | G12V                           | 22·65         |
| Wild type                                           | G13D                                  | 10·36         | G13D                           | 5·31          |
| Wild type                                           | Q61H <sup>†</sup>                     | 9·26          | Q61H                           | 1·36          |
| Wild type                                           | A146T <sup>†</sup>                    | 23·85         | A146T                          | 26·60         |
| Wild type                                           | A146T                                 | 21·81         | A146T                          | 45·76         |
| Wild type                                           | A146T                                 | 27·82         | A146T                          | 34·69         |
| Wild type                                           | A146T <sup>†</sup>                    | 37·60         | A146T                          | 1·64          |

\*Historical *KRAS* mutation data were generated before the start of the CORRECT trial using unknown testing technology and reported to the study sponsor at the time of enrolment.

<sup>†</sup>Specimens in which *KRAS*-wild-type status was also confirmed by next-generation sequencing. Because of the limited amount of tissue available for testing, next-generation sequencing was not performed on all samples.

Supplementary Table 5. Association of baseline plasma DNA levels with overall survival in placebo patients in the CORRECT trial

| <b>Quartile</b> | <b>Patients, n</b> | <b>Mean DNA per ml of plasma*</b> | <b>Median OS (days)</b> |
|-----------------|--------------------|-----------------------------------|-------------------------|
| 1               | 41                 | 2,633                             | 192                     |
| 2               | 42                 | 7,701                             | 159                     |
| 3               | 42                 | 18,873                            | 131                     |
| 4               | 41                 | 120,213                           | 73                      |

\*Mean DNA in genomic equivalents per ml of plasma obtained at enrolment.

Supplementary Table 6. Association of *KRAS*-mutant allele frequency detected in plasma DNA with overall survival in placebo patients in the CORRECT trial

| <b>Tertile</b> | <b>Patients, n</b> | <b>Mean <i>KRAS</i> mutation frequency*</b> | <b>Median OS (days)</b> |
|----------------|--------------------|---------------------------------------------|-------------------------|
| 1              | 39                 | 0.44                                        | 185                     |
| 2              | 38                 | 11                                          | 138                     |
| 3              | 38                 | 25                                          | 82                      |

\*Baseline plasma samples from placebo patients obtained at enrolment.

Supplementary Table 7. Association of *KRAS*-mutant molecules detected per ml of plasma with overall survival in placebo-treated patients in the CORRECT trial

| <b>Tertile</b> | <b>Patients, n</b> | <b>Mutant molecules per ml of plasma*</b> | <b>Median OS (days)</b> |
|----------------|--------------------|-------------------------------------------|-------------------------|
| 1              | 39                 | 28                                        | 189                     |
| 2              | 38                 | 739                                       | 137                     |
| 3              | 38                 | 27,831                                    | 79                      |

\*Determined by multiplying the amount of DNA per ml of plasma by the mutant allele frequency and dividing by 100.

Supplementary Table 8. Clinical activity of regorafenib versus placebo in patients in the CORRECT trial with high or low plasma protein levels

| Protein | Cutoff Method | Protein level* | Overall survival  |                  |                                         | Progression-free survival |                  |                                         |
|---------|---------------|----------------|-------------------|------------------|-----------------------------------------|---------------------------|------------------|-----------------------------------------|
|         |               |                | <i>n</i> (events) | HR (95% CI)      | Interaction <i>P</i> value <sup>†</sup> | <i>n</i> (events)         | HR (95% CI)      | Interaction <i>P</i> value <sup>†</sup> |
| ANG-2   | Median        | Low            | 305 (137)         | 0.71 (0.50–1.00) | 0.577                                   | 305 (263)                 | 0.47 (0.36–0.61) | 0.336                                   |
|         |               | High           | 306 (201)         | 0.67 (0.50–0.89) |                                         | 306 (274)                 | 0.47 (0.36–0.61) |                                         |
|         | Best fit      | Low            | 488 (239)         | 0.74 (0.57–0.96) | 0.600                                   | 447 (386)                 | 0.44 (0.36–0.55) | 0.306                                   |
|         |               | High           | 123 (99)          | 0.69 (0.46–1.04) |                                         | 164 (151)                 | 0.62 (0.44–0.86) |                                         |
|         | ROC Curve     | Low            | 343 (154)         | 0.72 (0.52–1.00) | 0.648                                   | 383 (329)                 | 0.46 (0.36–0.58) | 0.818                                   |
|         |               | High           | 268 (184)         | 0.68 (0.50–0.92) |                                         | 228 (208)                 | 0.52 (0.39–0.70) |                                         |
| BMP-7   | Median        | Low            | 528 (295)         | 0.75 (0.59–0.95) | 0.290                                   | 528 (467)                 | 0.51 (0.42–0.62) | 0.086                                   |
|         |               | High           | 83 (43)           | 0.53 (0.29–0.98) |                                         | 83 (70)                   | 0.29 (0.16–0.50) |                                         |
|         | Best fit      | Low            | 589 (322)         | 0.74 (0.59–0.93) | 0.061                                   | 569 (498)                 | 0.49 (0.40–0.59) | 0.487                                   |
|         |               | High           | 22 (16)           | 0.19 (0.05–0.65) |                                         | 42 (39)                   | 0.39 (0.18–0.83) |                                         |
|         | ROC Curve     | Low            | 589 (322)         | 0.74 (0.59–0.93) | 0.061                                   | 569 (498)                 | 0.49 (0.40–0.59) | 0.487                                   |
|         |               | High           | 22 (16)           | 0.19 (0.05–0.65) |                                         | 42 (39)                   | 0.39 (0.18–0.83) |                                         |
| VWF     | Median        | Low            | 305 (151)         | 0.62 (0.45–0.86) | 0.339                                   | 305 (261)                 | 0.39 (0.30–0.51) | 0.020                                   |
|         |               | High           | 306 (187)         | 0.80 (0.59–1.09) |                                         | 306 (276)                 | 0.60 (0.46–0.78) |                                         |
|         | Best fit      | Low            | 193 (86)          | 0.53 (0.34–0.82) | 0.145                                   | 193 (159)                 | 0.41 (0.29–0.58) | 0.267                                   |
|         |               | High           | 418 (252)         | 0.81 (0.63–1.05) |                                         | 418 (378)                 | 0.52 (0.41–0.64) |                                         |
|         | ROC Curve     | Low            | 254 (119)         | 0.58 (0.40–0.83) | 0.226                                   | 182 (149)                 | 0.41 (0.29–0.58) | 0.261                                   |
|         |               | High           | 357 (219)         | 0.80 (0.60–1.06) |                                         | 429 (388)                 | 0.50 (0.40–0.63) |                                         |
| IL6     | Median        | Low            | 305 (129)         | 0.69 (0.48–0.99) | 0.921                                   | 305 (268)                 | 0.45 (0.35–0.59) | 0.962                                   |
|         |               | High           | 306 (209)         | 0.73 (0.55–0.98) |                                         | 306 (269)                 | 0.52 (0.40–0.68) |                                         |
|         | Best fit      | Low            | 379 (168)         | 0.68 (0.50–0.94) | 0.597                                   | 443 (380)                 | 0.46 (0.37–0.58) | 0.639                                   |
|         |               | High           | 232 (170)         | 0.80 (0.58–1.09) |                                         | 168 (157)                 | 0.54 (0.38–0.75) |                                         |
|         | ROC Curve     | Low            | 270 (106)         | 0.70 (0.47–1.03) | 0.980                                   | 442 (379)                 | 0.47 (0.37–0.58) | 0.614                                   |
|         |               | High           | 341 (232)         | 0.72 (0.55–0.95) |                                         | 169 (158)                 | 0.53 (0.38–0.74) |                                         |

| Protein | Cutoff Method | Protein level* | Overall survival     |                  |                                            | Progression-free survival |                  |                                            |
|---------|---------------|----------------|----------------------|------------------|--------------------------------------------|---------------------------|------------------|--------------------------------------------|
|         |               |                | <i>n</i><br>(events) | HR (95% CI)      | Interaction<br><i>P</i> value <sup>†</sup> | <i>n</i><br>(events)      | HR (95% CI)      | Interaction<br><i>P</i> value <sup>†</sup> |
|         |               |                |                      |                  |                                            |                           |                  |                                            |
| IL8     | Median        | Low            | 305 (119)            | 0.68 (0.47–0.97) | 0.442                                      | 305 (260)                 | 0.45 (0.35–0.58) | 0.840                                      |
|         |               | High           | 306 (219)            | 0.58 (0.43–0.77) |                                            | 306 (277)                 | 0.46 (0.36–0.61) |                                            |
|         | Best fit      | Low            | 352 (145)            | 0.65 (0.47–0.91) | 0.941                                      | 528 (457)                 | 0.48 (0.39–0.58) | 0.63                                       |
|         |               | High           | 259 (193)            | 0.68 (0.50–0.92) |                                            | 83 (80)                   | 0.57 (0.36–0.91) |                                            |
|         | ROC Curve     | Low            | 290 (107)            | 0.70 (0.48–1.04) | 0.422                                      | 361 (306)                 | 0.44 (0.34–0.56) | 0.566                                      |
|         |               | High           | 321 (231)            | 0.59 (0.45–0.78) |                                            | 250 (321)                 | 0.52 (0.39–0.70) |                                            |
| MCSF    | Median        | Low            | 304 (146)            | 0.67 (0.48–0.93) | 0.648                                      | 304 (274)                 | 0.41 (0.32–0.53) | 0.123                                      |
|         |               | High           | 307 (192)            | 0.74 (0.55–1.00) |                                            | 307 (263)                 | 0.57 (0.44–0.74) |                                            |
|         | Best fit      | Low            | 334 (159)            | 0.76 (0.55–1.05) | 0.592                                      | 284 (257)                 | 0.44 (0.34–0.57) | 0.404                                      |
|         |               | High           | 277 (179)            | 0.66 (0.48–0.90) |                                            | 327 (280)                 | 0.53 (0.41–0.68) |                                            |
|         | ROC Curve     | Low            | 334 (159)            | 0.76 (0.55–1.05) | 0.592                                      | 552 (483)                 | 0.47 (0.39–0.57) | 0.671                                      |
|         |               | High           | 277 (179)            | 0.66 (0.48–0.90) |                                            | 59 (54)                   | 0.56 (0.31–1.02) |                                            |
| PIGF    | Median        | Low            | 304 (155)            | 0.92 (0.64–1.31) | 0.095                                      | 304 (265)                 | 0.46 (0.35–0.61) | 0.862                                      |
|         |               | High           | 307 (183)            | 0.62 (0.46–0.83) |                                            | 307 (272)                 | 0.49 (0.38–0.63) |                                            |
|         | Best fit      | Low            | 339 (169)            | 0.85 (0.61–1.18) | 0.260                                      | 512 (445)                 | 0.47 (0.39–0.58) | 0.407                                      |
|         |               | High           | 272 (169)            | 0.65 (0.48–0.88) |                                            | 99 (92)                   | 0.55 (0.36–0.85) |                                            |
|         | ROC Curve     | Low            | 339 (169)            | 0.85 (0.61–1.18) | 0.260                                      | 419 (360)                 | 0.45 (0.36–0.57) | 0.146                                      |
|         |               | High           | 272 (169)            | 0.65 (0.48–0.88) |                                            | 192 (177)                 | 0.56 (0.41–0.77) |                                            |
| SCDF1   | Median        | Low            | 305 (171)            | 0.77 (0.56–1.06) | 0.508                                      | 305 (265)                 | 0.52 (0.40–0.67) | 0.237                                      |
|         |               | High           | 306 (167)            | 0.68 (0.49–0.92) |                                            | 306 (272)                 | 0.45 (0.35–0.59) |                                            |
|         | Best fit      | Low            | 46 (18)              | 0.42 (0.17–1.07) | 0.240                                      | 233 (201)                 | 0.50 (0.37–0.68) | 0.549                                      |
|         |               | High           | 565 (320)            | 0.74 (0.59–0.93) |                                            | 378 (336)                 | 0.47 (0.38–0.60) |                                            |
|         | ROC Curve     | Low            | 170 (84)             | 0.81 (0.52–1.27) | 0.507                                      | 293 (253)                 | 0.51 (0.39–0.67) | 0.333                                      |
|         |               | High           | 441 (254)            | 0.68 (0.53–0.88) |                                            | 318 (284)                 | 0.46 (0.36–0.59) |                                            |

| Protein | Cutoff Method | Protein level* | Overall survival  |                  |                                         | Progression-free survival |                  |                                         |
|---------|---------------|----------------|-------------------|------------------|-----------------------------------------|---------------------------|------------------|-----------------------------------------|
|         |               |                | <i>n</i> (events) | HR (95% CI)      | Interaction <i>P</i> value <sup>†</sup> | <i>n</i> (events)         | HR (95% CI)      | Interaction <i>P</i> value <sup>†</sup> |
| VEGFR   | Median        | Low            | 305 (181)         | 0.70 (0.51–0.94) | 0.784                                   | 305 (269)                 | 0.46 (0.35–0.60) | 0.622                                   |
|         |               | High           | 306 (157)         | 0.74 (0.54–1.03) |                                         | 306 (268)                 | 0.50 (0.39–0.65) |                                         |
|         | Best fit      | Low            | 77 (35)           | 1.03 (0.47–2.29) | 0.401                                   | 77 (65)                   | 0.43 (0.25–0.75) | 0.765                                   |
|         |               | High           | 534 (303)         | 0.70 (0.56–0.89) |                                         | 534 (472)                 | 0.49 (0.40–0.60) |                                         |
|         | ROC Curve     | Low            | 77 (35)           | 1.03 (0.47–2.29) | 0.401                                   | 157 (132)                 | 0.42 (0.29–0.60) | 0.229                                   |
|         |               | High           | 534 (303)         | 0.70 (0.56–0.89) |                                         | 454 (405)                 | 0.50 (0.41–0.62) |                                         |
| TIE-1   | Median        | Low            | 305 (140)         | 0.83 (0.58–1.18) | 0.248                                   | 305 (259)                 | 0.52 (0.40–0.67) | 0.492                                   |
|         |               | High           | 306 (198)         | 0.65 (0.49–0.87) |                                         | 306 (278)                 | 0.45 (0.35–0.59) |                                         |
|         | Best fit      | Low            | 377 (172)         | 0.87 (0.64–1.20) | 0.035                                   | 595 (523)                 | 0.47 (0.39–0.57) | 0.663                                   |
|         |               | High           | 234 (166)         | 0.56 (0.41–0.77) |                                         | 16 (14)                   | 0.52 (0.15–1.79) |                                         |
|         | ROC Curve     | Low            | 377 (172)         | 0.87 (0.64–1.20) | 0.035                                   | 289 (243)                 | 0.49 (0.38–0.65) | 0.800                                   |
|         |               | High           | 234 (166)         | 0.56 (0.41–0.77) |                                         | 322 (294)                 | 0.47 (0.37–0.60) |                                         |
| TIMP-2  | Median        | Low            | 305 (173)         | 0.74 (0.54–1.00) | 0.812                                   | 305 (271)                 | 0.52 (0.40–0.67) | 0.322                                   |
|         |               | High           | 306 (165)         | 0.70 (0.51–0.97) |                                         | 306 (266)                 | 0.45 (0.34–0.58) |                                         |
|         | Best fit      | Low            | 299 (173)         | 0.77 (0.56–1.04) | 0.572                                   | 299 (267)                 | 0.53 (0.41–0.69) | 0.236                                   |
|         |               | High           | 312 (165)         | 0.68 (0.49–0.94) |                                         | 312 (270)                 | 0.44 (0.34–0.58) |                                         |
|         | ROC Curve     | Low            | 373 (200)         | 0.67 (0.50–0.89) | 0.488                                   | 200 (172)                 | 0.53 (0.38–0.72) | 0.667                                   |
|         |               | High           | 238 (138)         | 0.79 (0.56–1.14) |                                         | 411 (365)                 | 0.46 (0.37–0.58) |                                         |
| VEGF-A  | Median        | Low            | 301 (149)         | 0.66 (0.47–0.92) | 0.613                                   | 301 (258)                 | 0.42 (0.32–0.55) | 0.127                                   |
|         |               | High           | 301 (186)         | 0.75 (0.55–1.02) |                                         | 301 (272)                 | 0.57 (0.44–0.74) |                                         |
|         | Best fit      | Low            | 492 (253)         | 0.76 (0.59–0.99) | 0.283                                   | 410 (355)                 | 0.46 (0.37–0.58) | 0.330                                   |
|         |               | High           | 110 (82)          | 0.60 (0.38–0.93) |                                         | 192 (175)                 | 0.60 (0.43–0.82) |                                         |
|         | ROC Curve     | Low            | 319 (156)         | 0.67 (0.48–0.92) | 0.628                                   | 121 (98)                  | 0.35 (0.22–0.56) | 0.169                                   |
|         |               | High           | 283 (179)         | 0.75 (0.55–1.02) |                                         | 481 (432)                 | 0.53 (0.43–0.65) |                                         |

| Protein            | Cutoff Method | Protein level* | Overall survival  |                   |                                         | Progression-free survival |                  |                                         |
|--------------------|---------------|----------------|-------------------|-------------------|-----------------------------------------|---------------------------|------------------|-----------------------------------------|
|                    |               |                | <i>n</i> (events) | HR (95% CI)       | Interaction <i>P</i> value <sup>†</sup> | <i>n</i> (events)         | HR (95% CI)      | Interaction <i>P</i> value <sup>†</sup> |
| VEGF-C             | Median        | Low            | 305 (162)         | 0.77 (0.55–1.07)  | 0.518                                   | 305 (261)                 | 0.51 (0.39–0.66) | 0.748                                   |
|                    |               | High           | 306 (176)         | 0.66 (0.49–0.90)  |                                         | 306 (276)                 | 0.46 (0.36–0.59) |                                         |
|                    | Best fit      | Low            | 29 (11)           | 4.51 (0.58–35.26) | 0.084                                   | 76 (60)                   | 0.58 (0.33–1.03) | 0.53                                    |
|                    |               | High           | 582 (327)         | 0.69 (0.55–0.86)  |                                         | 535 (477)                 | 0.47 (0.38–0.57) |                                         |
|                    | ROC Curve     | Low            | 454 (239)         | 0.74 (0.57–0.97)  | 0.631                                   | 253 (212)                 | 0.55 (0.41–0.73) | 0.391                                   |
|                    |               | High           | 157 (99)          | 0.66 (0.44–0.99)  |                                         | 358 (325)                 | 0.44 (0.35–0.56) |                                         |
| VEGF-D             | Median        | Low            | 305 (150)         | 0.71 (0.51–0.99)  | 0.955                                   | 305 (261)                 | 0.44 (0.34–0.57) | 0.669                                   |
|                    |               | High           | 306 (188)         | 0.71 (0.52–0.96)  |                                         | 306 (276)                 | 0.52 (0.40–0.66) |                                         |
|                    | Best fit      | Low            | 387 (189)         | 0.78 (0.58–1.05)  | 0.232                                   | 439 (376)                 | 0.50 (0.40–0.62) | 0.284                                   |
|                    |               | High           | 224 (149)         | 0.61 (0.44–0.85)  |                                         | 172 (161)                 | 0.41 (0.28–0.58) |                                         |
|                    | ROC Curve     | Low            | 382 (186)         | 0.76 (0.56–1.02)  | 0.402                                   | 396 (336)                 | 0.52 (0.41–0.65) | 0.161                                   |
|                    |               | High           | 229 (152)         | 0.64 (0.46–0.89)  |                                         | 215 (201)                 | 0.40 (0.30–0.55) |                                         |
| VEGF-A isoform 121 | Median        | Low            | 305 (157)         | 0.68 (0.49–0.95)  | 0.762                                   | 305 (270)                 | 0.48 (0.37–0.62) | 0.939                                   |
|                    |               | High           | 306 (181)         | 0.74 (0.54–1.00)  |                                         | 306 (267)                 | 0.48 (0.37–0.62) |                                         |
|                    | Best fit      | Low            | 130 (51)          | 0.55 (0.31–0.97)  | 0.271                                   | 160 (136)                 | 0.40 (0.27–0.59) | 0.442                                   |
|                    |               | High           | 481 (287)         | 0.77 (0.60–0.98)  |                                         | 451 (401)                 | 0.51 (0.41–0.63) |                                         |
|                    | ROC Curve     | Low            | 160 (67)          | 0.51 (0.31–0.84)  | 0.093                                   | 159 (135)                 | 0.40 (0.27–0.60) | 0.5                                     |
|                    |               | High           | 451 (271)         | 0.81 (0.63–1.04)  |                                         | 452 (402)                 | 0.51 (0.41–0.63) |                                         |

\*Protein levels were determined by multiplex immunoassay or enzyme-linked immunosorbent assay in baseline plasma samples obtained from 611 patients enrolled in the CORRECT trial (placebo: *n* = 199; regorafenib: *n* = 412).

<sup>†</sup>Interaction *p* value comparing clinical outcomes in the indicated low versus high biomarker subgroups.

ANG-2: Angiotensin 2; BMP-7: bone morphogenetic protein 7; CI: confidence interval; HR: hazard ratio; IL6: interleukin 6; IL8: interleukin 8; MCSF: macrophage colony stimulating factor; PIGF: placental growth factor; ROC: receiver operating characteristic; SCDF1 stromal cell-derived factor 1; sTIE-1: soluble tyrosine kinase with immunoglobulin-like and epidermal growth factor like-domains 1; TIMP-2: tissue-derived metalloproteinase 2; VEGF: vascular endothelial growth factor; VEGFR: VEGF receptor; VWF: Von Willebrandt Factor.

Supplementary Table 9. Association of plasma protein levels with overall (OS) and progression-free survival (PFS) in placebo patients in the CORRECT trial

| Protein | Cutoff Method | Overall survival                     |                  | Progression-free survival            |                  |
|---------|---------------|--------------------------------------|------------------|--------------------------------------|------------------|
|         |               | High/low protein levels HR (95% CI)* | Log-rank p value | High/low protein levels HR (95% CI)* | Log-rank p value |
| ANG-2   | Median        | 2.30 (1.60–3.32)                     | <0.001           | 1.62 (1.21–2.16)                     | 0.001            |
|         | Best fit      | 3.38 (2.28–5.01)                     | <0.001           | 1.37 (1.00–1.88)                     | 0.046            |
|         | ROC curve     | 2.42 (1.68–3.48)                     | <0.001           | 1.45 (1.08–1.96)                     | 0.013            |
| BMP-7   | Median        | 1.18 (0.73–1.91)                     | 0.498            | 1.67 (1.11–2.50)                     | 0.012            |
|         | Best fit      | 2.96 (1.37–6.40)                     | 0.004            | 1.58 (0.91–2.73)                     | 0.102            |
|         | ROC curve     | 2.96 (1.37–6.40)                     | 0.004            | 1.58 (0.91–2.73)                     | 0.102            |
| VWF     | Median        | 1.37 (0.96–1.96)                     | 0.083            | 0.97 (0.73–1.30)                     | 0.838            |
|         | Best fit      | 1.37 (0.92–2.05)                     | 0.122            | 1.37 (0.99–1.90)                     | 0.060            |
|         | ROC curve     | 1.41 (0.98–2.04)                     | 0.064            | 1.39 (1.00–1.93)                     | 0.050            |
| IL6     | Median        | 2.21 (1.52–3.22)                     | <0.001           | 1.22 (0.91–1.63)                     | 0.175            |
|         | Best fit      | 2.29 (1.60–3.28)                     | <0.001           | 1.72 (1.26–2.35)                     | <0.001           |
|         | ROC curve     | 2.47 (1.67–3.65)                     | <0.001           | 1.72 (1.26–2.35)                     | <0.001           |
| IL8     | Median        | 3.48 (2.39–5.06)                     | <0.001           | 1.63 (1.22–2.18)                     | <0.001           |
|         | Best fit      | 3.19 (2.21–4.60)                     | <0.001           | 2.08 (1.43–3.02)                     | <0.001           |
|         | ROC curve     | 3.83 (2.60–5.66)                     | <0.001           | 1.58 (1.18–2.12)                     | 0.002            |
| MCSF    | Median        | 1.50 (1.05–2.15)                     | 0.026            | 0.89 (0.67–1.19)                     | 0.447            |
|         | Best fit      | 1.83 (1.27–2.63)                     | <0.001           | 1.01 (0.76–1.35)                     | 0.945            |
|         | ROC curve     | 1.83 (1.27–2.63)                     | <0.001           | 1.11 (0.68–1.81)                     | 0.667            |
| PIGF    | Median        | 1.81 (1.24–2.65)                     | 0.002            | 1.06 (0.79–1.43)                     | 0.676            |
|         | Best fit      | 1.75 (1.21–2.53)                     | 0.002            | 1.38 (0.96–1.96)                     | 0.077            |
|         | ROC curve     | 1.75 (1.21–2.53)                     | 0.002            | 0.96 (0.71–1.29)                     | 0.776            |
| SCDF1   | Median        | 1.12 (0.78–1.59)                     | 0.546            | 1.27 (0.95–1.70)                     | 0.108            |
|         | Best fit      | 1.22 (0.62–2.41)                     | 0.564            | 1.21 (0.89–1.64)                     | 0.231            |
|         | ROC curve     | 1.45 (0.96–2.19)                     | 0.076            | 1.25 (0.93–1.68)                     | 0.134            |

| Protein            | Cutoff Method | Overall survival                     |                  | Progression-free survival            |                  |
|--------------------|---------------|--------------------------------------|------------------|--------------------------------------|------------------|
|                    |               | High/low protein levels HR (95% CI)* | Log-rank p value | High/low protein levels HR (95% CI)* | Log-rank p value |
| VEGFR              | Median        | 0.86 (0.60–1.23)                     | 0.408            | 0.95 (0.71–1.27)                     | 0.743            |
|                    | Best fit      | 2.03 (0.99–4.18)                     | 0.049            | 1.23 (0.76–1.98)                     | 0.405            |
|                    | ROC curve     | 2.03 (0.99–4.18)                     | 0.049            | 1.00 (0.72–1.40)                     | 0.993            |
| sTIE-1             | Median        | 1.91 (1.33–2.76)                     | <0.001           | 1.22 (0.92–1.63)                     | 0.171            |
|                    | Best fit      | 2.72 (1.90–3.90)                     | <0.001           | 2.84 (1.04–7.73)                     | 0.032            |
|                    | ROC curve     | 2.72 (1.90–3.90)                     | <0.001           | 1.22 (0.91–1.63)                     | 0.181            |
| TIMP-2             | Median        | 0.89 (0.62–1.27)                     | 0.515            | 0.96 (0.72–1.27)                     | 0.757            |
|                    | Best fit      | 0.89 (0.62–1.27)                     | 0.515            | 0.96 (0.72–1.27)                     | 0.757            |
|                    | ROC curve     | 0.92 (0.64–1.34)                     | 0.678            | 0.94 (0.70–1.27)                     | 0.711            |
| VEGF-A             | Median        | 1.27 (0.89–1.82)                     | 0.188            | 0.98 (0.73–1.31)                     | 0.870            |
|                    | Best fit      | 2.40 (1.61–3.57)                     | <0.001           | 1.12 (0.83–1.53)                     | 0.457            |
|                    | ROC curve     | 1.36 (0.95–1.94)                     | 0.094            | 0.93 (0.62–1.40)                     | 0.738            |
| VEGF-C             | Median        | 1.14 (0.79–1.63)                     | 0.485            | 1.05 (0.79–1.40)                     | 0.739            |
|                    | Best fit      | 7.41 (1.03–53.05)                    | 0.019            | 1.35 (0.82–2.24)                     | 0.239            |
|                    | ROC curve     | 1.32 (0.90–1.94)                     | 0.152            | 1.17 (0.87–1.58)                     | 0.287            |
| VEGF-D             | Median        | 1.29 (0.91–1.85)                     | 0.155            | 1.06 (0.79–1.41)                     | 0.708            |
|                    | Best fit      | 1.77 (1.24–2.53)                     | 0.002            | 1.51 (1.09–2.08)                     | 0.011            |
|                    | ROC curve     | 1.64 (1.15–2.35)                     | 0.006            | 1.49 (1.10–2.01)                     | 0.009            |
| VEGF-A isoform 121 | Median        | 1.19 (0.83–1.70)                     | 0.337            | 1.08 (0.81–1.44)                     | 0.596            |
|                    | Best fit      | 1.38 (0.85–2.26)                     | 0.192            | 1.14 (0.81–1.62)                     | 0.444            |
|                    | ROC curve     | 1.18 (0.75–1.84)                     | 0.473            | 1.14 (0.81–1.62)                     | 0.444            |

\*Protein levels were determined by multiplex immunoassay in baseline plasma samples obtained from 199 patients enrolled in the placebo arm of CORRECT. A total of 122 OS events and 187 PFS events were reported.. The analysis of VEGF-A levels included data from 195 patients, with a total of 120 OS events and 183 PFS events reported.

ANG-2: Angiopoietin 2; BMP-7: bone morphogenetic protein 7; CI: confidence interval; HR: hazard ratio; IL6: interleukin 6; IL8: interleukin 8; MCSF: macrophage colony stimulating factor; PIGF: placental growth factor; ROC: receiver operating characteristic; SCDF1 stromal cell-derived factor 1; sTIE-1: soluble tyrosine kinase with immunoglobulin-like and epidermal growth factor like-domains 1; TIMP-2: tissue-derived metalloproteinase 2; VEGF: vascular endothelial growth factor; VEGFR: VEGF receptor; VWF: Von Willebrandt Factor.
